# Supplementary material
Source: publisher site journal article supplement (https://www.dovepress.com/article/408623)
Supplement: Supplementary file 1 [file get_supplementary_file.php]

**Supplementary Materials**

**
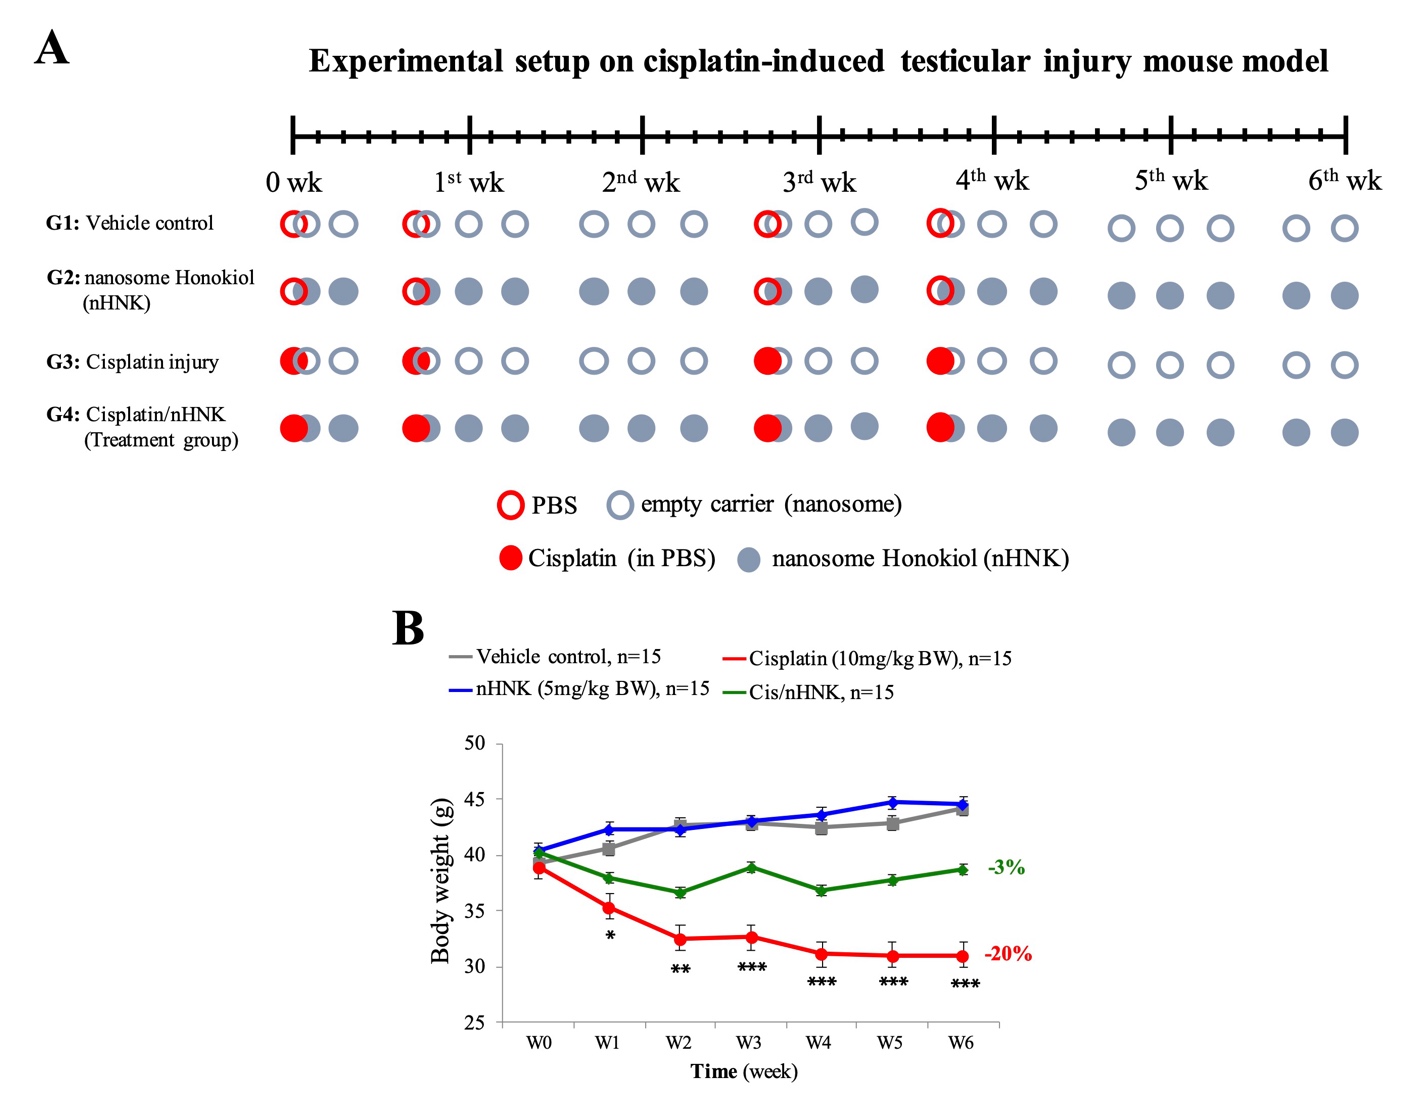
Supplementary figure 1**

**Supplementary figure legend 1 Establishment of a cisplatin-induced testicular damage mouse model.** **(A)** Graphic illustration of the experimental setup for cisplatin-induced testicular damage mouse model. Animals were randomly allocated into 4 experimental groups (n = 15 for each group) and described as follow. G1 (vehicle control): mice in this group were given four intraperinatal injections of 100 μL sterilized phosphate-buffered saline (PBS, red open circle), additional 100 μL of nanosized liposomes (vehicle control for HNK, grey open circle) was given at a three times/week interval for consecutive 6 weeks via tail vein injection (IV). G2 (nHNK, nanosome HNK group): besides sterilized PBS (as in G1), animals in this group received 5 mg/kg B.W. nHNK (grey closed circle, 100 μL volume) at a three times/week interval for 6 weeks. G3 (cisplatin injury group): the testicular injury was created by intraperinatal injections of 10 mg/kg B.W. cisplatin at weeks 0, 1, 3, and 4 (red closed circle); moreover, mice in this group also received an additional 100 μL of nHNK at the same intervals as mice in G2. G4 (cisplatin/nHNK, treatment group):mice in the treatment group were first injured by cisplatin as in G3, counteracting treatment was performed by injection of 5 mg/kg B.W. nHNK (grey closed circle, 100 μL volume) as indicated in the G2. **(B)** Mouse body weight was measured every week for six consecutive weeks to monitor the physical condition of the mice. Bars represent standard deviation (S.D.), and results were presented as mean ± standard deviation (S.D.). *=p<0.05, **=p<0.01, ***=p<0.001, and illustrated statistical differences between the experimental group and control values (grey line).


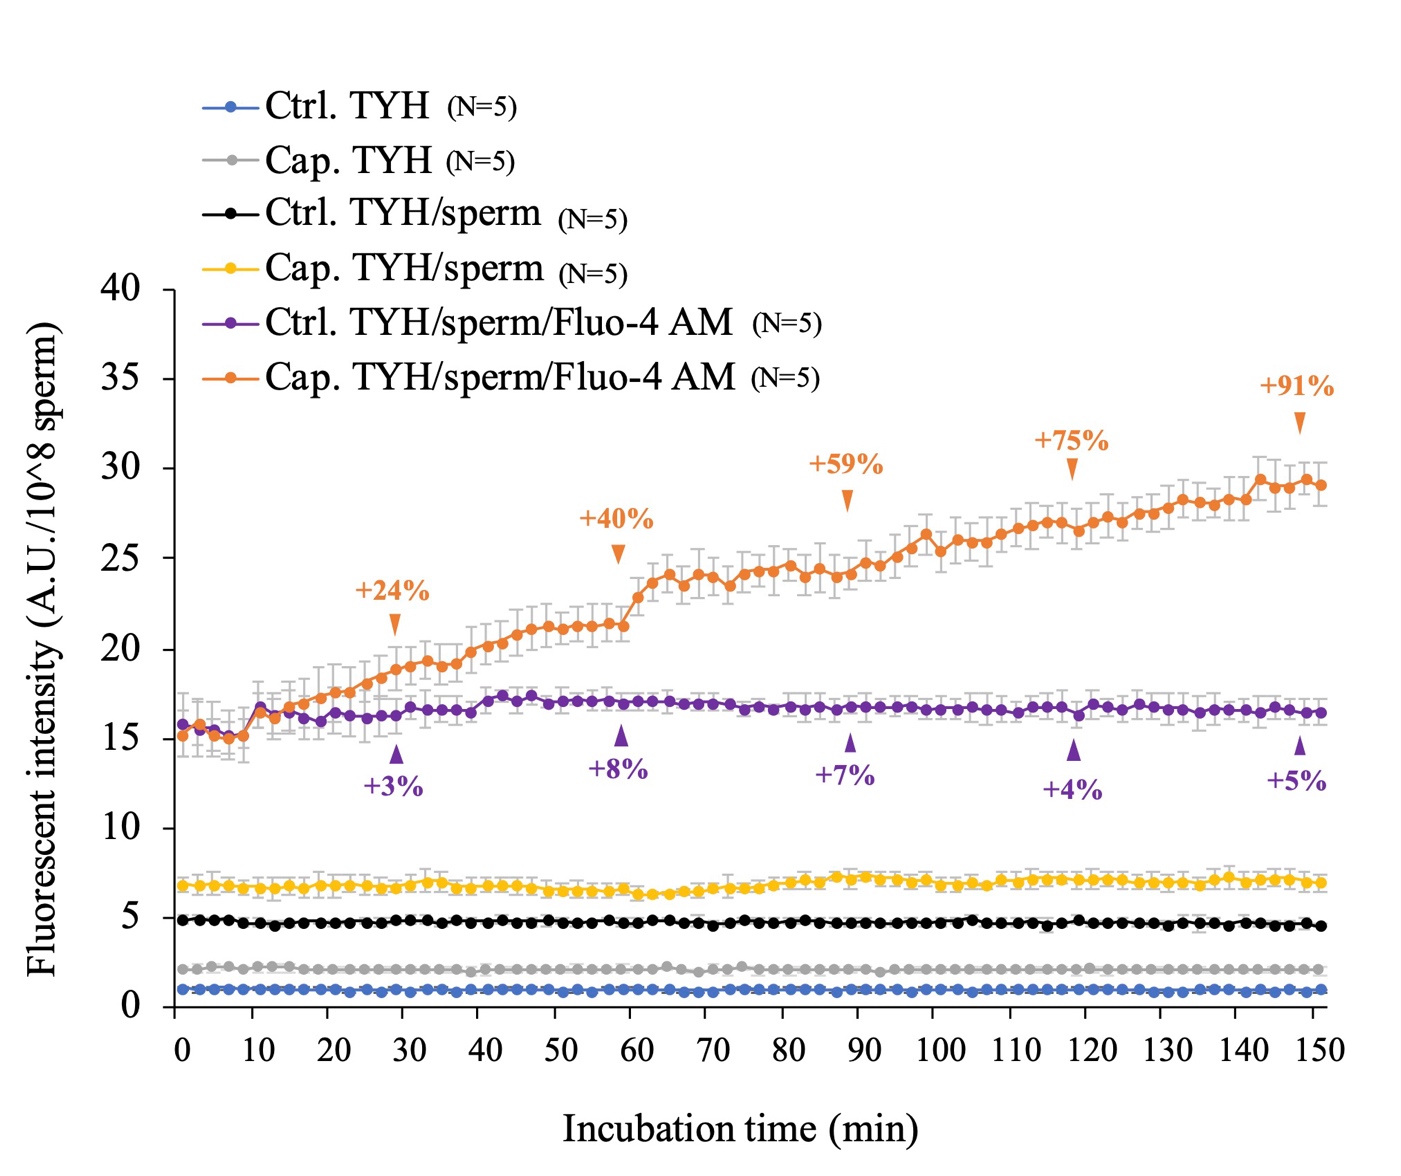
**Supplementary figure 2**

**Supplementary figure legend 2 Establishment of baseline values for the dynamic intracellular calcium influx measurements.** To establish baseline and background values for the dynamic intracellular calcium influx measurements, several sperm incubation conditions were set up and measured. Background signals were measured when sperm cells were incubated in either control (Ctrl. TYH) or capacitation (Cap. TYH) Hepes-based tyrodes medium (TYH). Sperm cells without Flu-4 AM dye-loading process (Ctrl./Cap. TYH/sperm) were used as background noise due to autofluorescent, and signals were measured and used for subtraction. Fluorescent signals from dye-loaded sperm cells were measured, and kinetic changes were monitored every 2 minutes for 150 minutes. Compared with relatively flat signal patterns in the above-mentioned control or baseline values, a time-dependent increase in signals can be measured when sperm cells are incubated in the capacitation medium (orange line). Bars represent standard deviation (S.D.). For each experimental condition, five independent repeats were performed, and results were presented as mean ± standard deviation (S.D.).

**
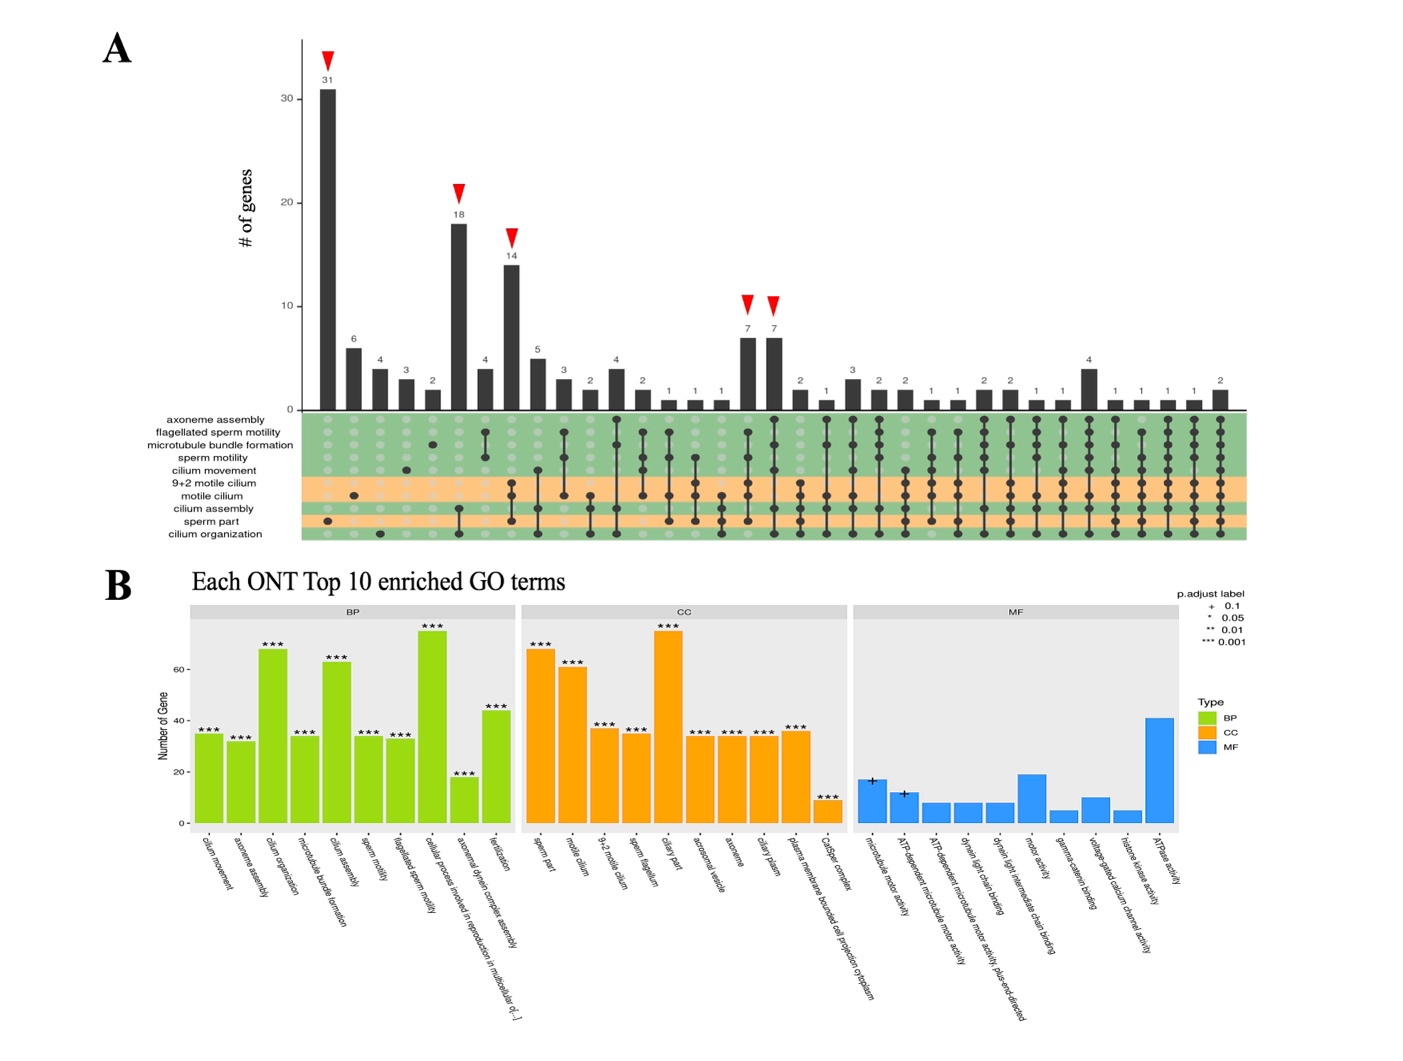
Supplementary figure 3**

**Supplementary figure legends 3 (A)** Next-generation sequence analysis showed that affected genes were related to the maintenance of sperm tail structure and sperm motility. Red arrowheads indicated the major gene clusters that were identified. **(B)** When affected genes were classified based on their biological process (BP), cellular component (CC), and molecular function (MF), the top 10 categories were presented.

**Supplementary figure 4**

**
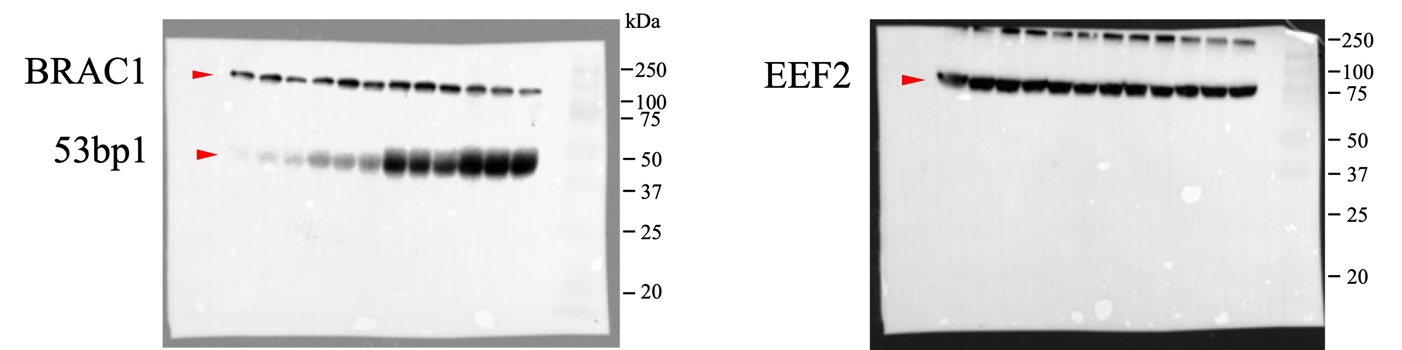
**

**Supplementary figure legends 4 Original whole blots for western blotting analysis**

**Supplementary table 1.** KEGG pathways analysis on the top 10 significantly affected pathways

| GO_accession | Description | p-value | Affected gene counts |
| --- | --- | --- | --- |
| GO:0098857 | membrane microdomain | 8.3E-22 | 119 |
| GO:0009611 | response to wounding | 1.9E-18 | 136 |
| GO:0048871 | multicellular organismal homeostasis | 2.3E-16 | 130 |
| GO:1901615 | organic hydroxy compound metabolic process | 5.2E-15 | 126 |
| GO:0031012 | extracellular matrix | 1.3E-14 | 124 |
| GO:0006979 | response to oxidative stress | 4.2E-13 | 106 |
| GO:0048608 | reproductive structure development | 4.9E-12 | 113 |
| GO:0050673 | epithelial cell proliferation | 2.1E-10 | 104 |
| GO:0015629 | actin cytoskeleton | 2.4E-10 | 115 |
| GO:0005911 | cell-cell junction | 2.2E-08 | 107 |

**Supplementary table 2.** RNAseq analysis of genes involved in the regulation of sperm functions

| **Ensembl_gene_id** | **Symbol** | **Description** | **Ctrl vs C** | **C vs CH** |
| --- | --- | --- | --- | --- |
| ENSMUSG00000002190 | Clgn | calmegin [Source:MGI Symbol;Acc:MGI:107472] | -8.915 | 8.408 |
| ENSMUSG00000010592 | Dazl | deleted in azoospermia-like [Source:MGI Symbol;Acc:MGI:1342328] | -5.172 | 5.632 |
| ENSMUSG00000017195 | Zpbp2 | zona pellucida binding protein 2 [Source:MGI Symbol;Acc:MGI:1916626] | -8.510 | 8.049 |
| ENSMUSG00000020193 | Zpbp | zona pellucida binding protein [Source:MGI Symbol;Acc:MGI:1855701] | -6.861 | 6.324 |
| ENSMUSG00000020882 | Cacnb1 | calcium channel, voltage-dependent, beta 1 subunit [Source:MGI Symbol;Acc:MGI:102522] | -3.117 | 3.359 |
| ENSMUSG00000021499 | Catsper3 | cation channel, sperm associated 3 [Source:MGI Symbol;Acc:MGI:1924106] | -6.846 | 6.134 |
| ENSMUSG00000021590 | Spata9 | spermatogenesis associated 9 [Source:MGI Symbol;Acc:MGI:1922821] | -7.087 | 6.394 |
| ENSMUSG00000023930 | Crisp2 | cysteine-rich secretory protein 2 [Source:MGI Symbol;Acc:MGI:98815] | -6.281 | 3.871 |
| ENSMUSG00000024112 | Cacna1h | calcium channel, voltage-dependent, T type, alpha 1H subunit [Source:MGI Symbol;Acc:MGI:1928842] | -5.665 | 5.015 |
| ENSMUSG00000025482 | Odf3 | outer dense fiber of sperm tails 3 [Source:MGI Symbol;Acc:MGI:1916537] | -6.676 | 6.443 |
| ENSMUSG00000027329 | Spef1 | sperm flagellar 1 [Source:MGI Symbol;Acc:MGI:3513546] | -4.201 | 3.879 |
| ENSMUSG00000029682 | Spam1 | sperm adhesion molecule 1 [Source:MGI Symbol;Acc:MGI:109335] | -6.880 | 5.895 |
| ENSMUSG00000029703 | Lrwd1 | leucine-rich repeats and WD repeat domain containing 1 [Source:MGI Symbol;Acc:MGI:1918985] | -6.040 | 5.597 |
| ENSMUSG00000029867 | Llcfc1 | LLLL and CFNLAS motif containing 1 [Source:MGI Symbol;Acc:MGI:1923856] | -6.899 | 6.277 |
| ENSMUSG00000030376 | Slc8a2 | solute carrier family 8 (sodium/calcium exchanger), member 2 [Source:MGI Symbol;Acc:MGI:107996] | -4.082 | 3.579 |
| ENSMUSG00000030851 | Ldhc | lactate dehydrogenase C [Source:MGI Symbol;Acc:MGI:96764] | -11.680 | 11.476 |
| ENSMUSG00000031552 | Adam18 | a disintegrin and metallopeptidase domain 18 [Source:MGI Symbol;Acc:MGI:105986] | -6.873 | 6.467 |
| ENSMUSG00000032921 | Odf4 | outer dense fiber of sperm tails 4 [Source:MGI Symbol;Acc:MGI:2182079] | -6.704 | 6.130 |
| ENSMUSG00000033486 | Catsper2 | cation channel, sperm associated 2 [Source:MGI Symbol;Acc:MGI:2387404] | -7.513 | 7.055 |
| ENSMUSG00000038128 | Camk4 | calcium/calmodulin-dependent protein kinase IV [Source:MGI Symbol;Acc:MGI:88258] | -3.428 | 2.890 |
| ENSMUSG00000038498 | Catsper1 | cation channel, sperm associated 1 [Source:MGI Symbol;Acc:MGI:2179947] | -7.296 | 6.657 |
| ENSMUSG00000038709 | Txndc8 | thioredoxin domain containing 8 [Source:MGI Symbol;Acc:MGI:1914652] | -6.384 | 6.282 |
| ENSMUSG00000040828 | Catsperd | cation channel sperm associated auxiliary subunit delta [Source:MGI Symbol;Acc:MGI:2147030] | -6.224 | 5.667 |
| ENSMUSG00000042554 | Zp3r | zona pellucida 3 receptor [Source:MGI Symbol;Acc:MGI:104965] | -7.479 | 6.903 |
| ENSMUSG00000047014 | Catsperb | cation channel sperm associated auxiliary subunit beta [Source:MGI Symbol;Acc:MGI:2443988] | -5.671 | 5.060 |
| ENSMUSG00000048003 | Catsper4 | cation channel, sperm associated 4 [Source:MGI Symbol;Acc:MGI:3043288] | -6.207 | 5.727 |
| ENSMUSG00000050623 | Catsperz | cation channel sperm associated auxiliary subunit zeta [Source:MGI Symbol;Acc:MGI:1914327] | -7.150 | 6.898 |
| ENSMUSG00000051146 | Camk2n2 | calcium/calmodulin-dependent protein kinase II inhibitor 2 [Source:MGI Symbol;Acc:MGI:1920297] | -3.065 | 2.981 |
| ENSMUSG00000052488 | Cherp | calcium homeostasis endoplasmic reticulum protein [Source:MGI Symbol;Acc:MGI:106417] | -4.021 | 3.497 |
| ENSMUSG00000053395 | Cacng8 | calcium channel, voltage-dependent, gamma subunit 8 [Source:MGI Symbol;Acc:MGI:1932376] | -2.712 | 2.502 |
| ENSMUSG00000056999 | Ide | insulin degrading enzyme [Source:MGI Symbol;Acc:MGI:96412] | -6.486 | 5.755 |
| ENSMUSG00000064158 | Izumo1 | izumo sperm-egg fusion 1 [Source:MGI Symbol;Acc:MGI:1920706] | -6.009 | 5.264 |
| ENSMUSG00000072663 | Spef2 | sperm flagellar 2 [Source:MGI Symbol;Acc:MGI:2443727] | -4.441 | 3.903 |
| ENSMUSG00000091476 | Catspere2 | catsper channel auxiliary subunit epsilon 2 [Source:MGI Symbol;Acc:MGI:5589632] | -3.921 | 2.256 |
| ENSMUSG00000080316 | Spaca6 | sperm acrosome associated 6 [Source:MGI Symbol;Acc:MGI:1922452] | -7.979 | 2.781 |
| ENSMUSG00000094845 | Tmem95 | transmembrane protein 95 [Source:MGI Symbol;Acc:MGI:3779488] | -5.683 | 4.978 |
| ENSMUSG00000102483 | Catspere1 | cation channel sperm associated auxiliary subunit epsilon 1 [Source:MGI Symbol;Acc:MGI:3647531] | -5.088 | 3.932 |
